# Supplementary material for: Dehydration of Cloudy-diesel Using Poly(Acrylamide-co-sodium Polyacrylate) Hydrogel Grafted Onto Cellulose
Source: Research Square preprint supplement (doi:10.21203/rs.3.rs-5020126/v1), 2024-10-07
Supplement: Supplementary file 1 [file 3979ac5a5d2a30cdd280905c.docx]

**SUPPLEMENTARY INFORMATION**

**DEHYDRATION OF CLOUDY-DIESEL USING HYDROGEL OF POLY(ACRYLAMIDE-CO-SODIUM POLYACRYLATE) GRAFTED ONTO CELLULOSE**

Isadora Dias Pereza*, Bianca Ramos Estevama, João B.P. Soaresb, Melissa Gurgel Adeodato Vieiraa, Leonardo Vasconcelos Fregolentea.

a Department of Process and Product Design - School of Chemical Engineering, University of Campinas (UNICAMP), 13083-852 Campinas-SP, Brazil.

b Department of Chemical and Materials Engineering, University of Alberta, T6G 1H9, Edmonton, Alberta, Canada

*Corresponding author e-mail: dpisadora@gmail.com

The distillation curve of the Canadian diesel used in the experiments was identified by the HT-SimDis analysis and is presented in Fig. S1. The Initial boiling point was determined at 98 ºC. At this temperature, the oil begins to produce vapors and forms a mixture with air that can ignite in the presence of a flame. The final boiling point was identified as 414 ºC. The oil used falls within the expected range for diesel (100-400 °C), making it an appropriate material for studying treatment with hydrogels.


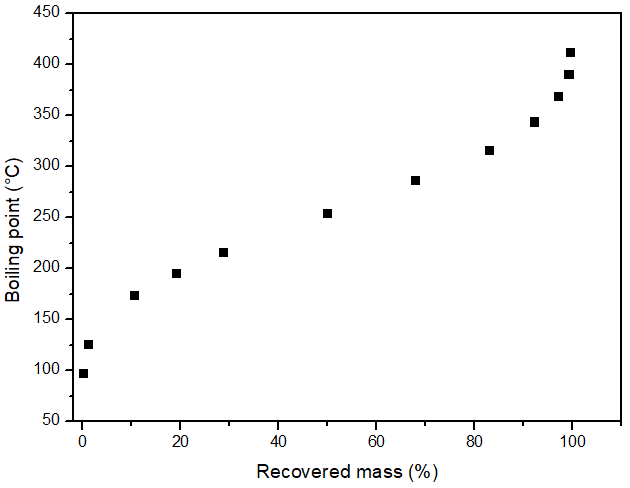


**Fig. S1.** Distillation curves of automotive diesel obtained from HT-SimDis simulated distillation.

Table S1 presents the analysis of variance (ANOVA) of the 2³ full factorial design used to investigate the synthesis condition of the cellulose-grafted hydrogel. The mathematical models are statistically significant since the F values calculated are higher than the tabulated F values and R² values are close to 1. Thus, the responses can be predicted by Eq. S1 and S2, regarding the maximum swelling degree (Wmax) and final water content in diesel, respectively.

| Wmax = 89.05 + 3.81*CT – 1.01*CP + 38.61*IS + 1.69*CT*CP + 7.13*CT*IS -5.45*CP*IS | (S1) |
| --- | --- |
| Final water concentration = 261.73 – 71.87*CT – 12.93*CP – 59.11*IS – 0.27*CT*CP + 26.75*CT*IS + 12.75*CT*IS | S(2) |

Where: CT is the cellulose type, CP is the cellulose percentage and IS is the initiation system, all of them in coded variables.

**Table S1:** ANOVA of the of the full factorial design (23 + duplicates) used to evaluate the cellulose-grafted hydrogel synthesis method.

| **Response** | **Source** | **SS** | **DF** | **MS** | **Fitting parameters** | | |
| --- | --- | --- | --- | --- | --- | --- | --- |
| **R²** | **Fcalc** | **Ftab** |
| Swelling degree | Regression | 25,690.07 | 7 | 3,670.01 | 0.9627 | 29.53 | 3.50 |
| Residue | 994,21 | 8 | 124.28 |
| Total | 26,684.28 | 15 |  |
| Final water content in diesel | Regression | 156,134.90 | 7 | 22,304.99 | 0.9772 | 49.07 | 3.50 |
| Residue | 3,636.60 | 8 | 454.58 |
| Total | 159,771.50 | 15 |  |

**Footnote:** SS: sum of square; DF: degree of freedom; MS: mean square; R²: coefficient of determination; Fcalc=MSRegression/MSresidue and Ftab: F tabulated value corresponding to the Fisher-Snedecor distribution.
